# Supplementary material
Source: PubMed Central journal article supplement (PMC4640126)

## SUPPLEMENTARY DATA

Fig. S1. Mean time to emerge (MET) in autumn and spring/summer for each species at the species growing site (2500 m) and 400 m lower in altitude (2100 m). Different letters indicate significant differences of MET at  $P < 0.05$  level.

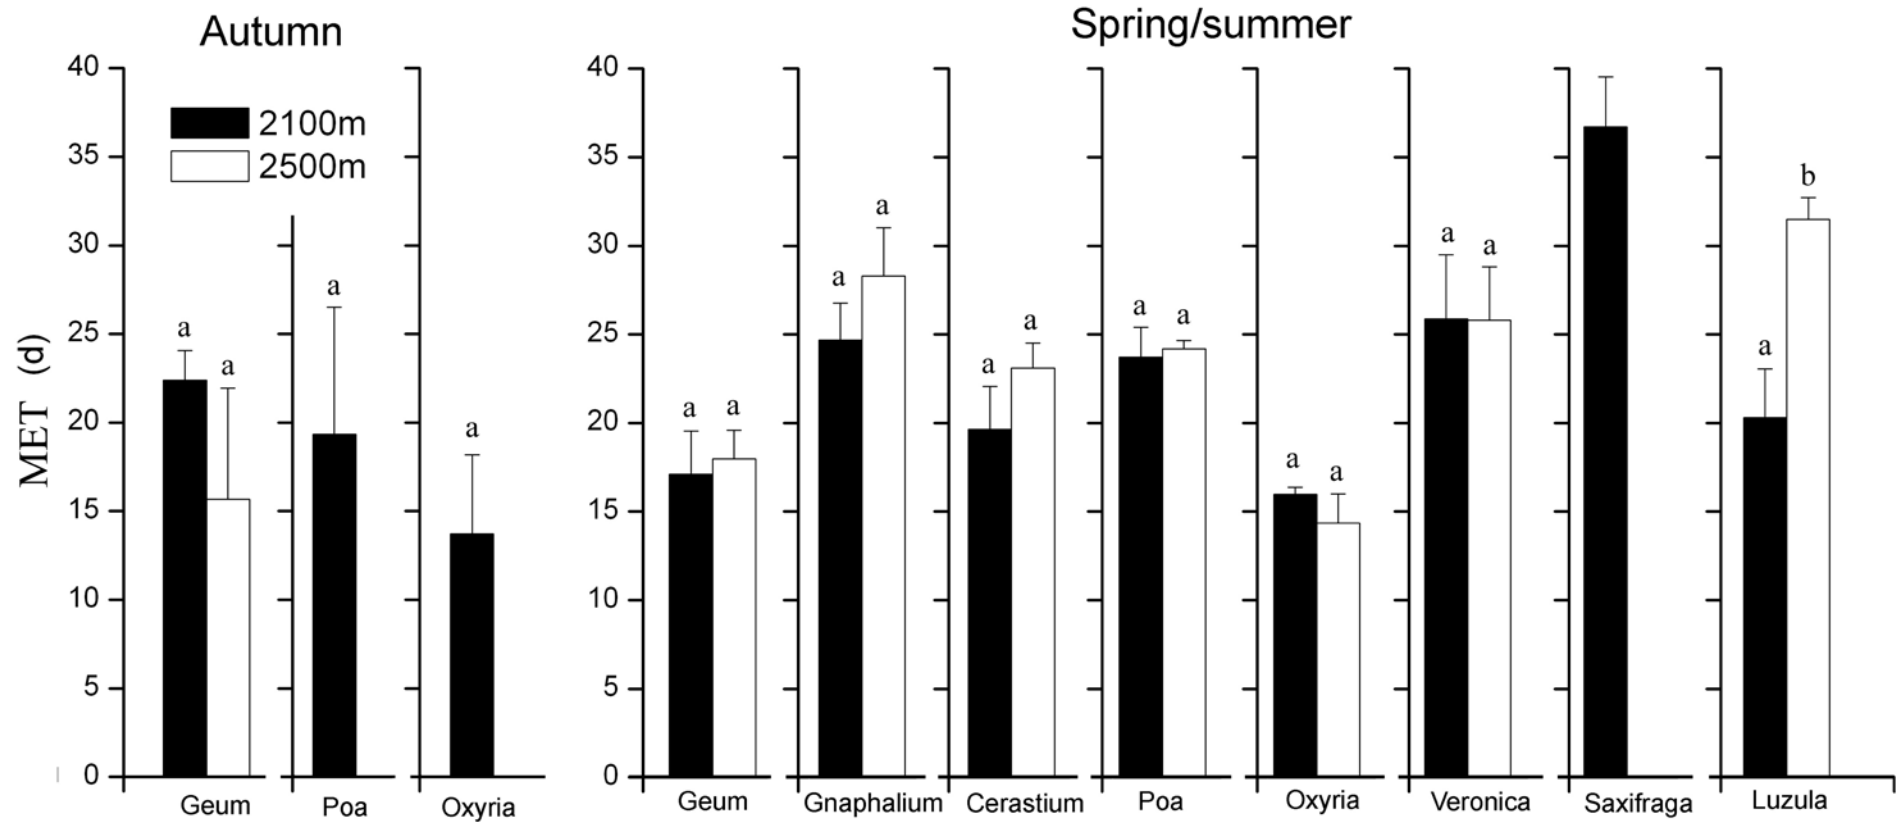

Fig. S2. Mean monthly and winter (Wt) mortality (means  $\pm$  s.e.) for each species and growing sites (i.e. number of dead seedlings in a given month / number of seedlings available up to that month). Results based on less than five seedlings per monitoring period are not shown.

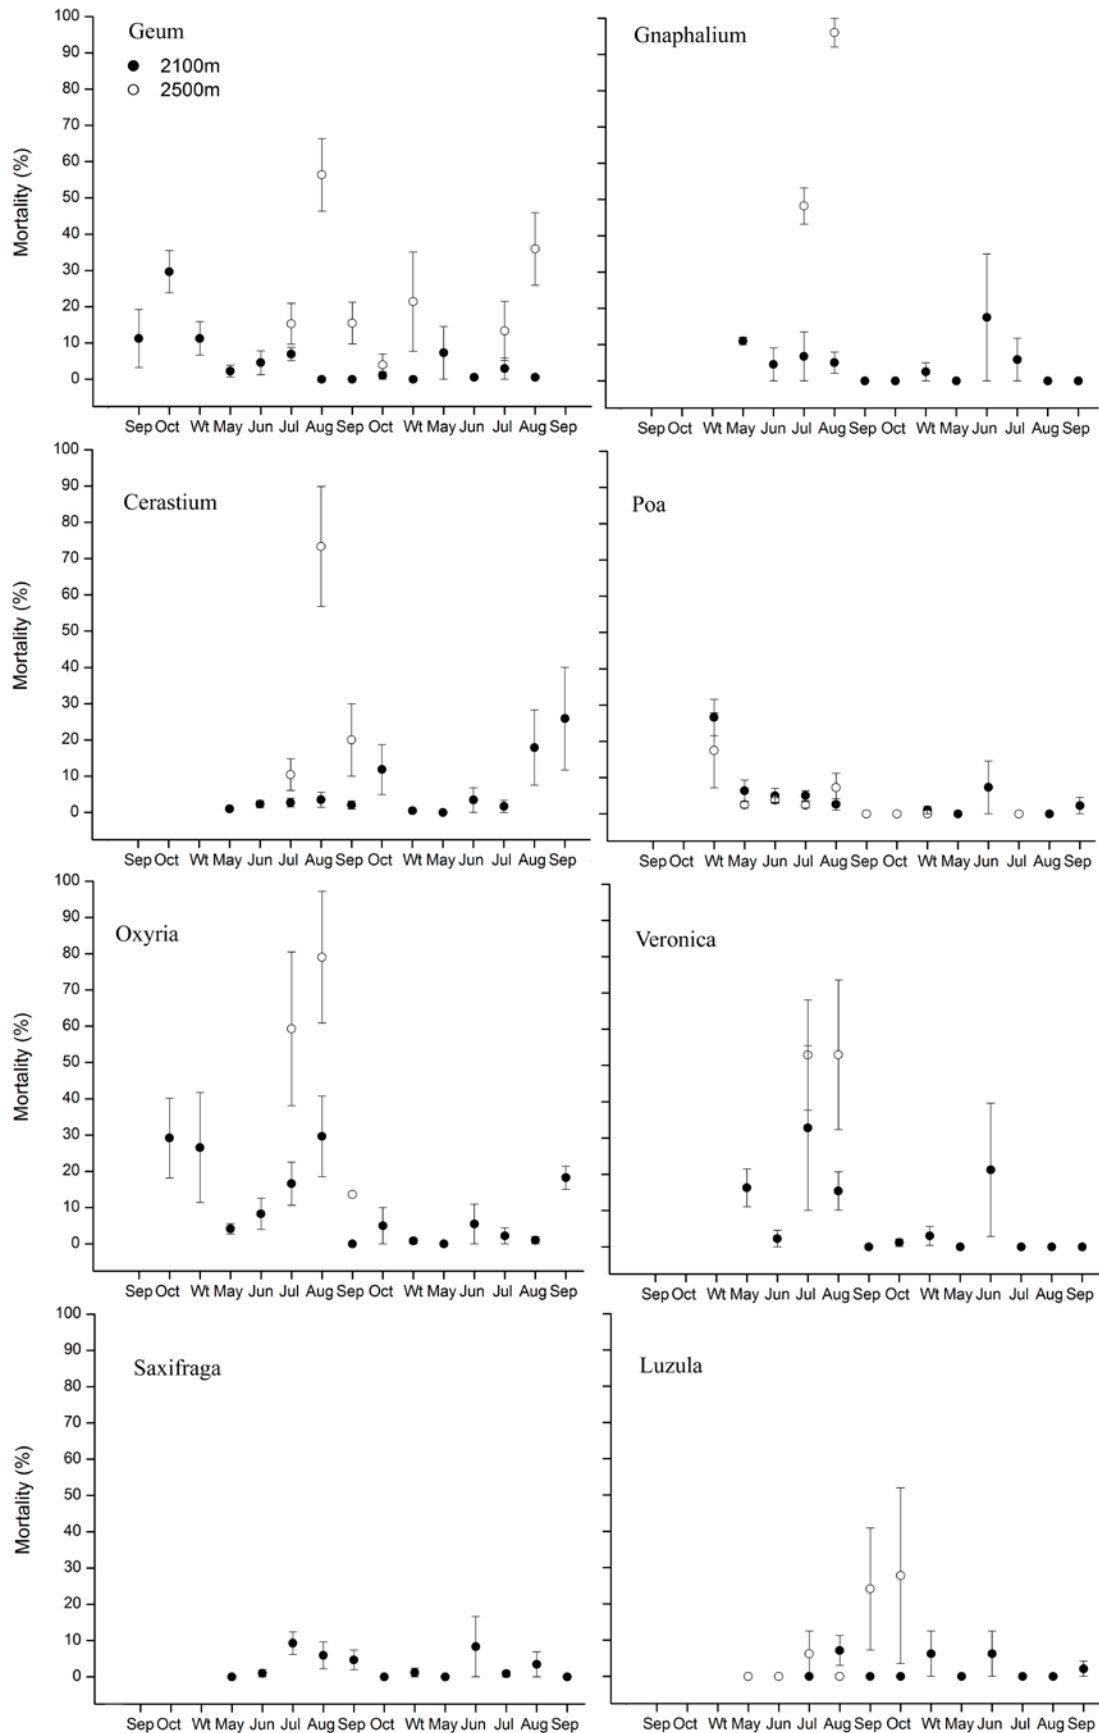

Supplement: supp_mcv101_aob-15064-s01.pdf [file supp_mcv101_aob-15064-s01.pdf]
